# Supplementary material for: Left atrial appendage aneurysm in pediatrics: Case study and literature review
Source: Front Cardiovasc Med. 2023 Aug 10;10:1211619. doi: 10.3389/fcvm.2023.1211619 (PMC10449248; doi:10.3389/fcvm.2023.1211619)
Supplement: Supplementary file 1 [file Table1.xlsx]

## Sheet: Sheet1
ID	Title	Year	FT vs Abs.	Jurisdiction
1	Huge left atrial appendage aneurysm revealed by chronic hiccups	2017	FT	Morocco
2	A rare giant congenital left atrial appendage aneurysm in a 1-day-old newborn	2018	FT	Turkey
3	The "giant dog ear" sign of left atrial appendage aneurysm—revisited on 3 T cardiac MRI (free-breathing, non-contrast)	2015	FT	India
4	Congenital giant aneurysm of the left atrial appendage in an infant	2011	FT	Italy
5	Congenital Left Atrial Appendage Aneurysm Diagnosed by Fetal Echocardiography	2009	FT	South Korea
6	Massive left atrial appendage aneurysm presenting as supraventricular tachycardia	2003	ABS	India
7	A rare case of giant congenital left atrial appendage aneurysm in a 4-month-old child	2017	FT	Saudi Arabia
8	Safe treatment of congenital left atrial appendage aneurysm using lateral thoracotomy on a 3-year-old patient	2020	FT	China
9	Giant intrapericardial aneurysm of the left atrial appendage	1989	FT	Netherlands
10	Congenital Aneurysm of Left Atrial Appendage: A Case Report	2010	FT	India
11	Congenital aneurysm of both left ventricle and left atrium	2018	FT	USA
12	A giant aneurysm of the left atrial appendage in childhood	2014	FT	Turkey
13	Left Atrial Appendage Aneurysm Correlation of Noninvasive with Clinical and Surgical Findings: Report of a Case	1975	FT	USA
14	Congenital-Left Atrial Appendage Aneurysm in an 8-Year-Old Girl	2012	FT	India
15	Aneurisma gigante del apéndice auricular izquierdo	2006	FT	Cuba
16	Surgical management of an aneurysm of the left atrial appendage to prevent potential sequelae	2013	FT	Japan
17	Expansion of a Huge Compressive Left Atrial Appendage Aneurysm in a 29- Day-Old Infant	2020	FT	Japan
18	Asymptomatic left atrial appendage aneurysm (LAAA) with pericardial defect in a 1-year-old girl	2018	FT	Japan
19	An incidentally diagnosed asymptomatic congenital left atrial appendage aneurysm	2014	FT	Turkey
20	Giant Left Atrial Appendage Aneurysm in an Infant	2020	FT	Canada
21	Thoracoscopic resection of left atrial appendage aneurysm in a 16-year-old boy	2021	FT	USA
22	A giant left atrial appendage aneurysm with a large pinball-like thrombus in a 2 year old	2012	FT	India
23	Combination of congenital left atrial appendage aneurysm in an infant with transposition of the great arteries: a previously unreported association	2015	FT	Turkey
24	Left Atrial Appendage Aneurysm in a Two Month Old Infant: A Case report	2014	FT	Saudi Arabia
25	Congenital left atrial appendage aneurysm: Prenatal diagnosis and outcome of a rare cardiac abnormality	2021	FT	China
26	Left Atrial Appendage Aneurysm in a Child	2004	FT	Japan
27	The dangerous fifth chamber: congenital left atrial appendage aneurysm	2012	FT	Turkey
28	Aneurysm of the Left Atrial Appendage	1979	FT	Belgium
29	Asymptomatic giant congenital left atrial aneurysm	2019	FT	Turkey
30	Left atrial appendage aneurysm in pediatrics	2020	FT	China
31	Resection of a Congenital Left Atrial Appendage Aneurysm without Extracorporeal Circulation	2009	FT	Korea
32	SEVERE ANEURYSMAL DILATATION OF THE LEFT ATRIAL APPENDAGE - A CASE-REPORT	1994	ABS	Tunisia
33	Congenital left atrial appendage aneurysm with unexpected course of left anterior descending coronary artery	2021	FT	Singapore
34	A case of diagnosis of giant left atrial appendage diverticulum during fetal period to follow-up treatment after birth	2020	ABS	China
35	Left Atrial Appendage Aneurysm Characterized by Multimodal Imaging	2020	FT	USA
36	Planning and execution of catheter closure of a giant left atrial appendage aneurysm causing recurrent cardioembolism	2020	FT	India
37	Aneurysm left atrial appendage	2017	FT	Venezuela
38	Congenital left atrial appendage aneurysm: Atypical presentation	2017	FT	Morocco
39	Giant left atrial appendage aneurysm in association with tricuspid atresia	2016	FT	India
40	Giant left atrial appendage aneurysm compressing the left anterior descending coronary artery	2016	FT	Egypt
41	Giant Congenital Left Atrial Appendage Aneurysm	2015	FT	China
42	Congenital left atrial appendage aneurysm interfering with preexisting pericardial effusion in an infant with myopericarditis	2015	FT	Turkey
43	Left atrial appendage aneurysm and atrial septal defect	2014	FT	Mexico
44	Off-pump snare technique for congenital left atrial appendage aneurysm	2014	FT	USA
45	Giant congenital left atrial appendage aneurysm	2013	FT	London
46	Left atrial appendage aneurysm: an unusual cause of hematuria with stroke	2013	FT	India
47	Cerebral Emboli from Aneurysm of Left Atrial Appendage	1969	FT	London
48	Aneurysm of left atrial appendix diagnosed in the intrauterine period	2012	FT	Turkey
49	Giant Left Atrial Appendage Aneurysm in a Neonate	2012	FT	Canada
50	Giant left atrial appendage with a common ventricular-appendicular wall and an abnormal course of the circumflex coronary artery in an asymptomatic 18-month-old girl	2008	FT	Ireland
51	Congenital left atrial appendage aneurysm in a 2-year-old boy	2006	FT	Germany
52	[Aneurysm of the left atrial appendage]	2005	FT	Cuba
53	Does the left atrial appendage enlargement lead to the formation of the left atrial appendage aneurysm? [Czy poszerzenie uszka lewego przedsionka jest wstepem do tetniaka?]	1998	ABS	Poland
54	Dilated left atrial appendage causing abnormal cardiac shadow	1988	ABS	Japan
55	CONGENITAL ANEURYSM OF THE LEFT ATRIUM - DIAGNOSIS AND MANAGEMENT	1984	FT	New Zealand
56	CONGENITAL ANEURYSMS OF THE LEFT ATRIUM WITH INTACT PERICARDIUM - VALUE OF DIAGNOSTIC METHODS FOR RECOGNITION, PROGNOSIS, AND THERAPY	1983	ABS	Germany
57	ENDOCARDIAL FIBROELASTOSIS AND ANEURYSMAL DILATATION OF LEFT ATRIAL APPENDAGE	1973	FT	USA
58	Successful radiofrequency ablation of accessory pathway associated with left atrial appendage aneurysm in a low birthweight premature patient	2019	FT	Turkey
59	Giant congenital intrapericardial left atrial appendage aneurysm: about a case and review of the literature	2016	FT	Morocco
60	Behrendt DM, Aberdeen E Congenital aneurysm of the left atrium. Ann Thorac Surg 1972; 13:54-9.	1972	FT	London
61	Srinivasan V, Levinski L, Idbeis B, Gingell RL, Pieroni DR, Subramanian S. Congenital aneurysm of the left atrium. Bull Texas Heart Inst 1980; 7: 405-10.	1980	FT	USA
62	WILLIAMS WG: Dilatation of the left atrial appendage. Br Heart J 25: 637, 1963	1963	FT	London
63	Camerini F, Galluzzi W, Grego M, Klugman S, Scagnol A. Congenital aneurysm of the left atrium. Eur J Cardiol 1975; 3: 65-9.	1975	ABS
64	Parmley LF. Congenital atriomegaly Circulation 1962. 25.553-8.	1962	FT	USA
65	A Case of a Left Atrial Appendage Disguised as a Coronary Artery Aneurysm	2021	FT	USA
66	Minimally invasive resection of a giant left atrial appendage aneurysm	2022	FT	USA
67	Prenatally diagnosed left atrial appendage aneurysm with various postnatal imaging investigations: A case report	2021	FT	Japan
68	The left atrial appendage congenital aneurysm in a two-year-old child: a case report	2021	FT	Poland
69	Heart in Heart: A Case Report of Giant Left Atrial Appendage Aneurysm	2023	ABS	Bangladesh
70	Left atrial appendage aneurysm enlarged in the neonatal period	2022	FT	Japan
